# Supplementary material for: Identification of the IGF1/PI3K/NF κB/ERK gene signalling networks associated with chemotherapy resistance and treatment response in high-grade serous epithelial ovarian cancer
Source: Springer Nature journal article supplement (doi:10.1186/1471-2407-13-549), 2013-11-16
Supplement: 12885_2013_4170_MOESM2_ESM.pdf [file 12885_2013_4170_MOESM2_ESM.pdf]

| <b>Gene Symbol</b> | <b>Chromosomal Location</b> | <b>log2(FoldChange)</b> |
|--------------------|-----------------------------|-------------------------|
| ADH1B              | chr4q23                     | 3.12                    |
| IL21R              | chr16p11                    | 2.08                    |
| IGLV1-44           | chr22q11.2                  | 1.78                    |
| IGL                | chr22q11.1-q11.2            | 1.77                    |
| IL2RA              | chr10p15-p14                | 1.68                    |
| HUNK               | chr21q22.1                  | 1.62                    |
| MASP1              | chr3q27-q28                 | 1.57                    |
| BATF               | chr14q24.3                  | 1.55                    |
| LOC91316           | chr22q11.23                 | 1.53                    |
| MEOX2              | chr7p22.1-p21.3             | 1.50                    |
| KIF25              | chr6q27                     | 1.48                    |
| TCP10              | chr6q27                     | 1.48                    |
| TBXA2R             | chr19p13.3                  | 1.39                    |
| NLRP1              | chr17p13.2                  | 1.39                    |
| NCF4               | chr22q13.1                  | 1.34                    |
| ZNF804A            | chr2q32.1                   | 1.34                    |
| PTGER3             | chr1p31.2                   | 1.27                    |
| AGTR1              | chr3q24                     | 1.22                    |
| IL21R              | chr16p11                    | 1.22                    |
| HS2ST1             | chr1p22.3                   | 1.17                    |
| ELTD1              | chr1p33-p32                 | 1.09                    |
| CLDN5              | chr22q11.21                 | 1.06                    |
| PSD3               | chr8p21.3                   | 1.05                    |
| KDR                | chr4q11-q12                 | 1.03                    |
| CEP250             | chr20q11.22                 | 1.03                    |
| FAM69A             | chr1p22.1                   | 1.01                    |
| SEMA3G             | chr3p21.1                   | 0.99                    |
| CCDC88A            | chr2p16.1                   | 0.98                    |
| VAV1               | chr19p13.2                  | 0.93                    |
| PCDH17             | chr13q21.1                  | 0.92                    |
| GLIPR1             | chr12q21.2                  | 0.91                    |
| MARCKS             | chr6q22.2                   | 0.89                    |
| MARCKS             | chr6q22.2                   | 0.80                    |
| MVK                | chr12q24                    | 0.80                    |
| ZFHX4              | chr8q21.11                  | 0.79                    |
| AQP1               | chr7p14                     | 0.77                    |
| COL4A2             | chr13q34                    | 0.76                    |
| PPAP2A             | chr5q11                     | 0.74                    |
| RRAGC              | chr1p34                     | 0.71                    |
| TUBB6              | chr18p11.21                 | 0.70                    |
| MARCKS             | chr6q22.2                   | 0.69                    |
| TULP4              | chr6q25-q26                 | 0.68                    |

|          |                    |       |
|----------|--------------------|-------|
| EIF2C3   | chr1p34.3          | 0.67  |
| ATPAF2   | chr17p11.2         | 0.67  |
| TRAF3    | chr14q32.32        | 0.63  |
| SLC38A7  | chr16q21           | 0.61  |
| ENPP2    | chr8q24.1          | 0.60  |
| STX7     | chr6q23.1          | 0.58  |
| FNDC3B   | chr3q26.31         | 0.53  |
| WDR1     | chr4p16.1          | 0.52  |
| HEXB     | chr5q13            | 0.50  |
| GNG11    | chr7q21            | 0.50  |
| ACTR2    | chr2p14            | 0.48  |
| TXLNA    | chr1p35.1          | 0.47  |
| CAP1     | chr1p34.2          | 0.44  |
| RTN4     | chr2p16.3          | 0.31  |
| SEPT2nd  | chr2q37            | -0.30 |
| HADHB    | chr2p23            | -0.34 |
| RPL7     | chr8q21.11         | -0.36 |
| GAPDH    | chr12p13           | -0.38 |
| ZNF79    | chr9q34            | -0.39 |
| ANP32B   | chr9q22.32         | -0.47 |
| HPS6     | chr10q24.32        | -0.50 |
| NCL      | chr2q37.1          | -0.54 |
| NCKIPSD  | chr3p21            | -0.55 |
| TTC4     | chr1p32.3          | -0.55 |
| PRNP     | chr20p13           | -0.58 |
| NDUFA10  | chr2q37.3          | -0.62 |
| EEF1B2   | chr2q33.3          | -0.62 |
| PER2     | chr2q37.3          | -0.62 |
| UQCRC2   | chr16p12           | -0.67 |
| MIPEP    | chr13q12           | -0.67 |
| AVPI1    | chr10q24.2         | -0.69 |
| PDCD4    | chr10q24           | -0.71 |
| PRPS2    | chrXp22.3-p22.2    | -0.73 |
| DPY19L4  | chr8q22.1          | -0.75 |
| FOXO4    | chrXq13.1          | -0.78 |
| SHANK2   | chr11q13.2         | -0.79 |
| FES      | chr15q26.1         | -0.80 |
| SOX17    | chr8q11.23         | -0.85 |
| ZNF239   | chr10q11.22-q11.23 | -0.88 |
| GPM6B    | chrXp22.2          | -0.92 |
| DDX11    | chr12p11           | -1.00 |
| TSNAXIP1 | chr16q22.1         | -1.01 |
| RAGE     | chr14q32           | -1.08 |

|                   |                 |       |
|-------------------|-----------------|-------|
| IGF1R             | chr15q26.3      | -1.10 |
| CARD10            | chr22q13.1      | -1.13 |
| HEMK1             | chr3p21.3       | -1.14 |
| FKBP1B /// MFSD2B | chr2p23.3       | -1.15 |
| ZZEF1             | chr17p13.2      | -1.20 |
| NPR2              | chr9p21-p12     | -1.21 |
| MATN2             | chr8q22         | -1.22 |
| LRIG1             | chr3p14         | -1.25 |
| CTAGE11P          | chr13q22.2      | -1.33 |
| OAZ3              | chr1q21.3       | -1.38 |
| DEPDC6            | chr8q24.12      | -1.40 |
| FBXL18            | chr7p22.2       | -1.44 |
| FGFR2             | chr10q26        | -1.46 |
| SMO               | chr7q32.3       | -1.47 |
| PLCE1             | chr10q23        | -1.52 |
| SNRNP200          | chr2q11.2       | -1.53 |
| GCKR              | chr2p23         | -1.55 |
| CD200             | chr3q12-q13     | -1.73 |
| CHL1              | chr3p26.1       | -1.79 |
| CD200             | chr3q12-q13     | -1.82 |
| EYA2              | chr20q13.1      | -1.83 |
| BMP8A             | chr1p34.3       | -1.91 |
| DLEC1             | chr3p21.3       | -2.43 |
| MAPRE3            | chr2p23.3-p23.1 | -2.70 |
